# Office-Based Buprenorphine Treatment of Opioid Use Disorder, Second Edition

Edited by John A. Renner Jr., M.D., Petros Levounis, M.D., M.A., and Anna T. LaRose, M.D.

As the epidemic of opioid misuse and overdose deaths grows in the United States, practical information on evidence-based treatment of opioid use disorder (OUD) becomes increasingly important. This second edition of *Office-Based Buprenorphine Treatment of Opioid Use Disorder* offers just that: accessible and applicable guidance for anyone interested in learning more about prescribing buprenorphine.

Bulleted clinical pearls at the end of each chapter, as well as specific clinical recommendations and detailed case discussions throughout the book, make it easier for readers to retain knowledge and integrate it into their practice.

The guide also features sample documentation and scales, including a treatment contract and a patient consent, that can be used to model documents in practice.

Among the updates in this new edition are chapters that address other pharmacotherapies useful in treating OUD, including methadone and naltrexone, as well as OUD treatment in the context of women's health and pregnancy. As an added bonus, this edition can also be used to complete the 8 hours of qualifying training required for the buprenorphine waiver. By a thorough reading of the material covered in the chapters of this book and successful completion of the posttest, physicians can meet the buprenorphine waiver training requirement.

**JUST PUBLISHED!**

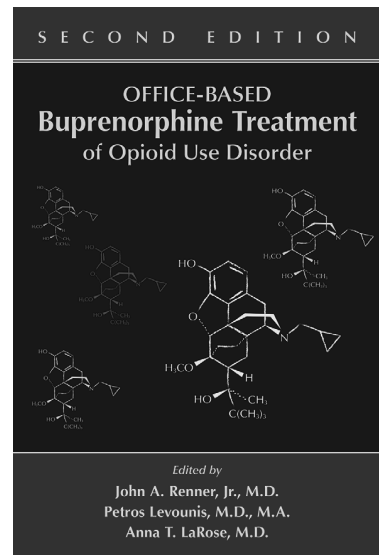

2018 • 395 pages • ISBN 978-1-61537-083-2 • Paperback • \$79.00 • Item #37083

2018 • 395 pages • ISBN 978-1-61537-170-9 • eBook • \$63.00 • Item #37170

AMERICAN  
PSYCHIATRIC  
ASSOCIATION  
PUBLISHING

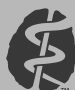

Order online @ [www.appi.org](http://www.appi.org)

or Call Toll Free: 1-800-368-5777

Email: [appi@psych.org](mailto:appi@psych.org)

20% Discount for American Psychiatric Association Members

25% Discount for APA Resident-Fellow Members

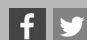

Priority Code AH1813A

# American Psychiatric Association Publishing Textbook of Psychopharmacology, Fifth Edition

Edited by Alan F. Schatzberg, M.D., and Charles B. Nemeroff, M.D., Ph.D.

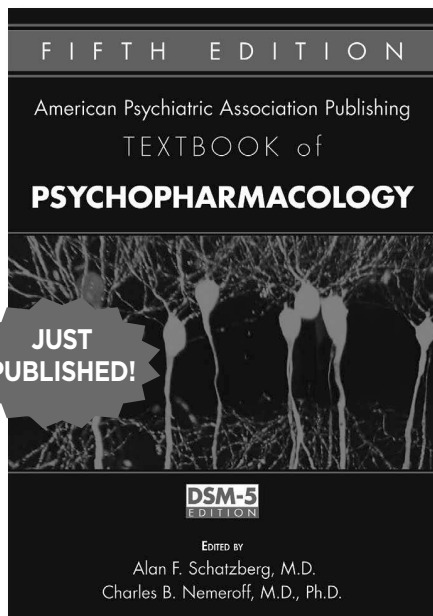

The *American Psychiatric Association Publishing Textbook of Psychopharmacology* is an indispensable and comprehensive resource for clinicians and trainees who prescribe psychotropic medications. Updated to reflect the new DSM-5 classification, this revised Fifth Edition maintains the user-friendly structure of its predecessors while offering in-depth coverage of the latest research in pharmacological principles, classes of drugs, and psychiatric disorders. Introductory chapters provide a theoretical grounding in clinical applications, with topics ranging from neurotransmitters to brain imaging in psychopharmacology. The bulk of the book is devoted to various classes of drugs, including antidepressants, anxiolytics, antipsychotics, mood stabilizers, and other agents, with each class divided into chapters on specific drugs—either new or revised to include the latest findings and trends.

Finally, the section on psychopharmacological treatment addresses evidence-based principles of clinical care for the full spectrum of mental disorders and conditions as well as for specific populations and circumstances—offering information on topics such as medication selection, combination and maintenance dosing regimens, monitoring and management of side effects, and strategies for optimizing treatment response.

## The book's beneficial features are many:

- The section on principles of pharmacology has been revised and reorganized to incorporate recent discoveries from the fields of neurobiology, genetics, brain imaging, and epidemiology.
- History and discovery, structure-activity relationships, pharmacological profiles, pharmacokinetics and disposition, mechanisms of action, indications and efficacy, side effects and toxicology, and drug-drug interactions are addressed for each agent. This consistent structure places the desired information at the clinician's fingertips and facilitates study for trainees.
- Coverage of drugs approved since the last edition is thorough, encompassing new antidepressants (e.g., vortioxetine), new antipsychotics (e.g., cariprazine), and agents on the clinical horizon (e.g., ketamine).

A work of uncommon scientific rigor and clinical utility, *The American Psychiatric Association Publishing Textbook of Psychopharmacology* provides state-of-the-art information on both the principles and the practice of psychopharmacological treatment of psychiatric disorders.

2017 • 1,823 pages • ISBN 978-1-58562-523-9 • Hardcover • \$299.00 • Item #62523

2017 • 1,823 pages • ISBN 978-1-61537-122-8 • eBook • \$240.00 • Item #37122

AMERICAN  
PSYCHIATRIC  
ASSOCIATION  
PUBLISHING

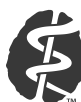

[www.appi.org](http://www.appi.org)

Email: [appi@psych.org](mailto:appi@psych.org)

Toll Free: 1-800-368-5777

20% Discount for American Psychiatric Association Members  
25% Discount for APA Resident-Fellow Members

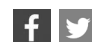

Priority Code AH1814

# The DSM-5 Collection

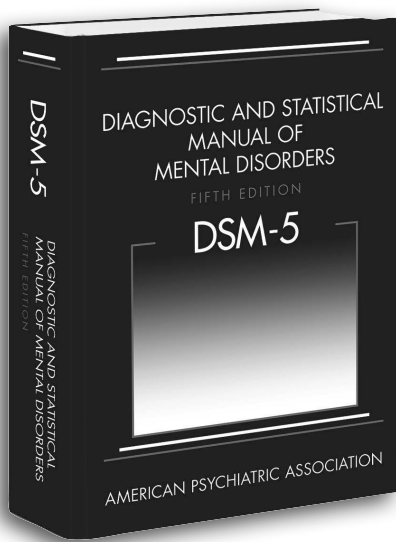

## Diagnostic and Statistical Manual of Mental Disorders, Fifth Edition (DSM-5®)

American Psychiatric Association

This new edition of *Diagnostic and Statistical Manual of Mental Disorders (DSM-5®)*, used by clinicians and researchers to diagnose and classify mental disorders, is the product of more than 10 years of effort by hundreds of international experts in all aspects of mental health. Their dedication and hard work have yielded an authoritative volume that defines and classifies mental disorders in order to improve diagnosis, treatment, and research.

The criteria are concise and explicit, intended to facilitate an objective assessment of symptom presentations in a variety of clinical settings—inpatient, outpatient, partial hospital, consultation-liaison, clinical, private practice, and primary care.

- The latest findings in neuroimaging and genetics have been integrated into each disorder along with gender and cultural considerations.
- The revised organizational structure recognizes symptoms that span multiple diagnostic categories, providing new clinical insights in diagnosis.

- Both ICD-9-CM and ICD-10-CM codes are included for each disorder.

The *Diagnostic and Statistical Manual of Mental Disorders*, Fifth Edition, is the most comprehensive, current, and critical resource for clinical practice available to today's mental health professionals.

2013 • 991 pages • ISBN 978-0-89042-554-1 • Hardcover • \$210.00 • Item #2554

2013 • 991 pages • ISBN 978-0-89042-555-8 • Paperback • \$160.00 • Item #2555

2013 • 991 pages • ISBN 978-0-89042-557-2 • eBook • \$128.00 • Item #2557

**DSM-5**  
COLLECTION

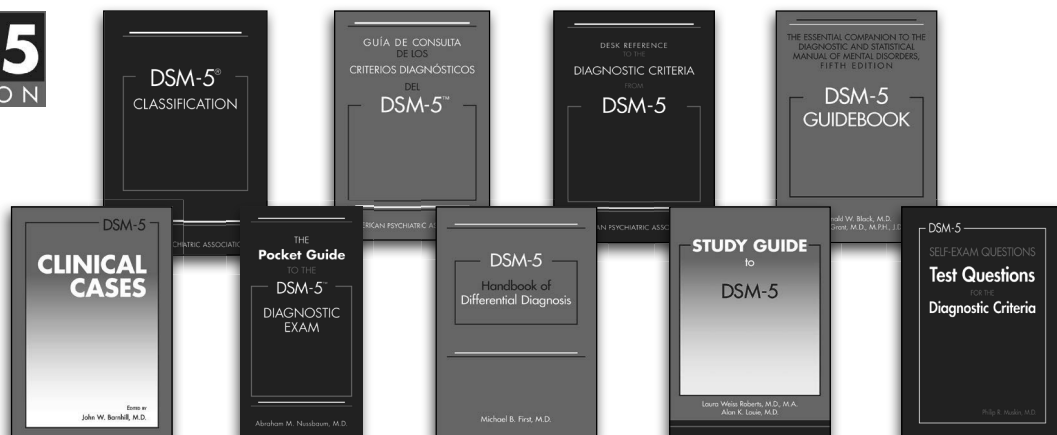

AMERICAN  
PSYCHIATRIC  
ASSOCIATION  
PUBLISHING

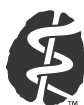

Order Online: [www.appi.org](http://www.appi.org)  
Phone: 703-907-7322  
Toll Free: 1-800-368-5777  
Email: [appi@psych.org](mailto:appi@psych.org)

20% Discount for American Psychiatric Association Members

25% Discount for APA Resident-Fellow Members AH1706A

# Our Work Matters

Hope. Recovery. Wellbeing.

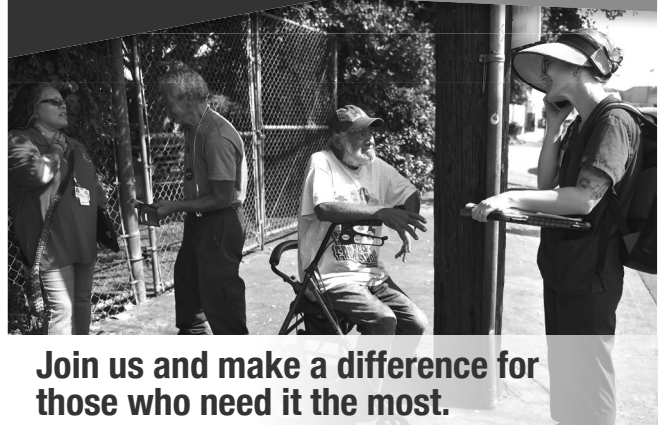

**Join us and make a difference for those who need it the most.**

Los Angeles County Department of Mental Health is a nationally recognized leader providing a wide range of services to one of the largest populations in the country. We invite you to join our team as we help the most vulnerable in our community find a path to independence and personal recovery.

Starting annual salary immediately post residency completion is **\$233,784** with **potential bonuses of \$32,000 annually**. Student **loan repayment** and recruitment incentives available.

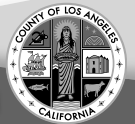

[www.psychiatristjobs.la](http://www.psychiatristjobs.la)

## Competency in Combining Pharmacotherapy and Psychotherapy Integrated and Split Treatment, Second Edition

### Core Competencies in Psychotherapy

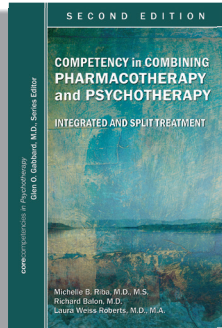

Michelle B. Riba, M.D., M.S.,  
Richard Balon, M.D., and  
Laura Weiss Roberts, M.D., M.A.

Series Editor: Glen O. Gabbard, M.D.

This book is designed to help psychiatrists at any stage of their career achieve competency in combining and coordinating pharmacotherapeutic and psychotherapeutic treatments for the benefit of their patients.

2018 • 175 pages • ISBN 978-1-61537-066-5 • Paperback • \$65.00 • Item #37066

2018 • 175 pages • ISBN 978-1-61537-180-8 • eBook • \$52.00 • Item #37180

AMERICAN  
PSYCHIATRIC  
ASSOCIATION  
PUBLISHING

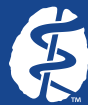

Order @ [www.appi.org](http://www.appi.org)  
Email: [appi@psych.org](mailto:appi@psych.org)  
Phone: 1-800-368-5777

AH1805A

Visit [ps.psychiatryonline.org](http://ps.psychiatryonline.org) for these features!

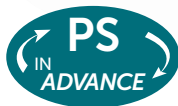

*New content is available in advance of print every 2 weeks!*

**Job Endings and Work Trajectories of Persons Receiving Supported Employment and Cognitive Remediation**

**Trends in Results of HBIPS National Performance Measures and Association With Year of Adoption**

Psychiatric  
Services  
**FROM PAGES  
TO PRACTICE**

Listen to our podcast, **Psychiatric Services From Pages to Practice**, and learn about the latest mental health services research and why it is relevant.

**Episode 10:** A discussion of psychiatric workforce issues, a depression-prevention program in high schools, and how implicit bias affects mental health care services

**Sign up (<http://appi.org/etocs>) to receive alerts as soon as new content is available.**

AMERICAN  
PSYCHIATRIC  
ASSOCIATION  
PUBLISHING

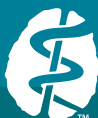

[ps.psychiatryonline.org](http://ps.psychiatryonline.org)

[www.appi.org](http://www.appi.org) • 1-800-368-5777 • e-mail: [appi@psych.org](mailto:appi@psych.org)

Keep up with the latest from *Psychiatric Services* on Facebook ([facebook.com/PsychiatryOnline](https://facebook.com/PsychiatryOnline)) and Twitter (@APAPubPsychSvcs).



# PSYCHIATRYonline

Your Destination for Lifelong Learning in Psychiatry

The one-stop resource for information on diagnosis, treatment, guidelines, the latest research, and breaking news from the field.

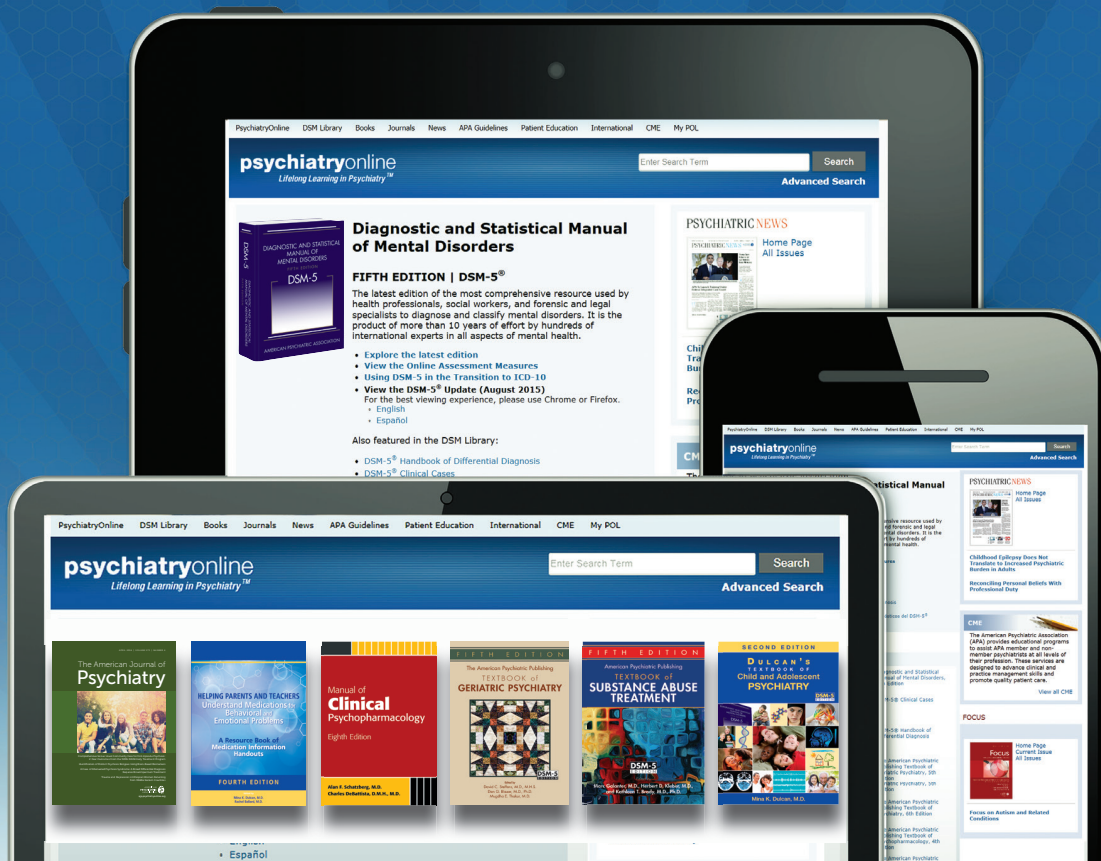

Subscribe to products individually or to the DSM Select package that includes the DSM-5<sup>®</sup> library, books and select journals.

**Go to [www.appi.org](http://www.appi.org) to subscribe.**

*Institutional subscription options are available. For more information contact: [institutions@psych.org](mailto:institutions@psych.org); 800-368-5777 ext. 3720*

AMERICAN  
PSYCHIATRIC  
ASSOCIATION  
PUBLISHING  
[www.appi.org](http://www.appi.org)

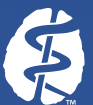

Source: http://ps.psychiatryonline.org/doi/suppl/10.1176/ps.2018.69.issue-5/suppl_file/back.pdf
