# Psychiatric Services

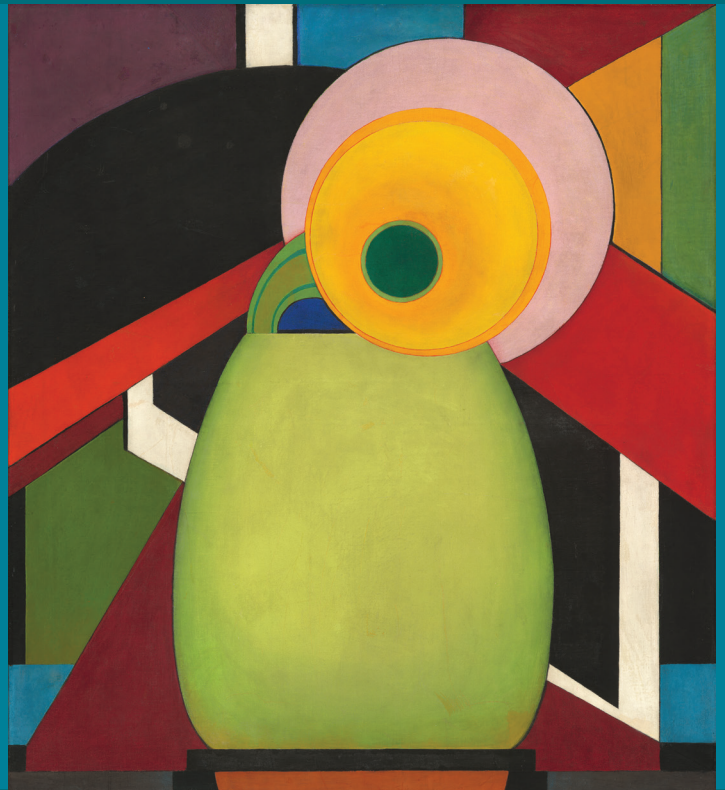

A framework for evaluating smartphone apps for clinical care

Peers helping others with serious mental illness to manage their health conditions

Effectiveness of collaborative care for depression among adolescents

Disparities in health care access and use among psychologically distressed U.S. adults
