

Searching for the perfect psychiatric career?

**Let APA JobCentral help!**

### Manage Your Career

- Browse hundreds of active job listings!
- Create an account to save jobs, store multiple resumes and cover letters and communicate with employers through our internal messaging system.
- Set up multiple job alerts specifying your skills, interests and location to receive e-mails when employers post jobs that match your criteria.

### Recruit for Open Positions

- Post your job in front of thousands of highly qualified psychiatrists.
- Cross promote your job listing in Psychiatric News.
- Search the anonymous resume database to find your ideal candidate.

AMERICAN  
PSYCHIATRIC  
ASSOCIATION

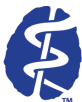

**JOBCENTRAL**  
The Career Hub for Psychiatry

**[jobs.psychiatry.org](https://jobs.psychiatry.org)**
